# Supplementary material
Source: Elsevier journal article supplement (http://library.osu.edu/sites/msa/suppmat/v236.i1.pp42-51/mmc5.pdf)
Supplement: mmc5 [file mmc5.pdf]

# $^{48}\text{Ti}^{79}\text{Br}$ Assigned Transitions

Transitions are labeled using four columns, the excited state J value ( $J'$ ), the ground state J value ( $J''$ ), the observed transition wavenumber (Observed) and the fit residual multiplied by  $10^3$  (O-C).

[23.48]<sup>4</sup>Γ<sub>5/2</sub><sup>-4</sup>Φ<sub>3/2</sub> (0,0)

| J'   | J''  | Observed   | O-C  | J'   | J''  | Observed   | O-C  |
|------|------|------------|------|------|------|------------|------|
| 4.5  | 3.5  | 23375.9354 | -3.9 | 31.5 | 32.5 | 23370.0452 | -1.4 |
| 5.5  | 4.5  | 23376.1386 | -8.4 | 32.5 | 33.5 | 23369.9339 | -0.7 |
| 6.5  | 5.5  | 23376.3504 | -6.8 | 33.5 | 34.5 | 23369.8255 | 0.6  |
| 7.5  | 6.5  | 23376.5655 | -4.5 | 34.5 | 35.5 | 23369.7181 | 0.6  |
| 8.5  | 7.5  | 23376.7854 | 0.1  | 35.5 | 36.5 | 23369.6137 | 1.2  |
| 10.5 | 9.5  | 23377.2203 | -3.2 | 36.5 | 37.5 | 23369.5123 | 2.4  |
| 11.5 | 10.5 | 23377.4461 | -0.4 | 37.5 | 38.5 | 23369.4119 | 2.4  |
| 12.5 | 11.5 | 23377.6690 | -2.9 | 38.5 | 39.5 | 23369.3125 | 1.1  |
| 13.5 | 12.5 | 23377.8968 | -3.1 | 39.5 | 40.5 | 23369.2164 | 0.8  |
| 14.5 | 13.5 | 23378.1320 | 1.6  | 40.5 | 41.5 | 23369.1224 | 0.3  |
| 15.5 | 14.5 | 23378.3618 | -1.6 | 41.5 | 42.5 | 23369.0286 | -2.2 |
| 16.5 | 15.5 | 23378.5956 | -3.3 | 42.5 | 43.5 | 23368.9436 | 1.9  |
| 17.5 | 16.5 | 23378.8355 | -1.3 | 43.5 | 44.5 | 23368.8562 | 1.3  |
| 18.5 | 17.5 | 23379.0713 | -6.0 | 44.5 | 45.5 | 23368.7691 | -1.1 |
| 19.5 | 18.5 | 23379.3168 | -3.4 | 45.5 | 46.5 | 23368.6844 | -3.3 |
| 20.5 | 19.5 | 23379.5646 | -1.0 | 46.5 | 47.5 | 23368.6060 | -1.4 |
| 21.5 | 20.5 | 23379.8125 | -1.0 | 47.5 | 48.5 | 23368.5269 | -2.3 |
| 22.5 | 21.5 | 23380.0610 | -2.7 | 48.5 | 49.5 | 23368.4492 | -4.0 |
| 23.5 | 22.5 | 23380.3155 | -1.0 | 49.5 | 50.5 | 23368.3742 | -5.0 |
| 24.5 | 23.5 | 23380.5687 | -2.9 | 50.5 | 51.5 | 23368.3091 | 1.8  |
| 25.5 | 24.5 | 23380.8292 | 0.0  | 51.5 | 52.5 | 23368.2361 | -1.4 |
| 26.5 | 25.5 | 23381.0894 | 0.3  | 52.5 | 53.5 | 23368.1710 | 1.3  |
| 27.5 | 26.5 | 23381.3496 | -1.8 | 53.5 | 54.5 | 23368.1026 | -1.3 |
| 28.5 | 27.5 | 23381.6154 | -0.7 | 54.5 | 55.5 | 23368.0369 | -3.2 |
| 29.5 | 28.5 | 23381.8823 | -0.9 | 55.5 | 56.5 | 23367.9796 | 1.4  |
| 30.5 | 29.5 | 23382.1531 | 0.5  | 56.5 | 57.5 | 23367.9189 | 0.5  |
| 31.5 | 30.5 | 23382.4236 | -0.7 | 57.5 | 58.5 | 23367.8582 | -2.2 |
| 32.5 | 31.5 | 23382.6958 | -2.6 | 58.5 | 59.5 | 23367.8040 | -0.3 |
| 33.5 | 32.5 | 23382.9727 | -2.0 | 59.5 | 60.5 | 23367.7504 | 0.3  |
| 34.5 | 33.5 | 23383.2529 | -0.5 | 60.5 | 61.5 | 23367.6964 | -1.4 |
| 35.5 | 34.5 | 23383.5347 | 0.4  | 61.5 | 62.5 | 23367.6463 | -1.0 |
| 36.5 | 35.5 | 23383.8163 | -1.2 | 5.5  | 5.5  | 23375.0799 | -2.5 |
| 37.5 | 36.5 | 23384.1018 | -1.1 | 6.5  | 6.5  | 23375.0972 | -1.9 |
| 38.5 | 37.5 | 23384.3887 | -1.8 | 7.5  | 7.5  | 23375.1172 | -1.1 |
| 39.5 | 38.5 | 23384.6785 | -1.8 | 8.5  | 8.5  | 23375.1376 | -2.5 |
| 40.5 | 39.5 | 23384.9744 | 2.1  | 9.5  | 9.5  | 23375.1622 | -2.2 |
| 41.5 | 40.5 | 23385.2646 | -1.9 | 10.5 | 10.5 | 23375.1903 | -1.0 |
| 42.5 | 41.5 | 23385.5622 | -0.6 | 11.5 | 11.5 | 23375.2193 | -1.4 |
| 43.5 | 42.5 | 23385.8607 | -0.6 | 12.5 | 12.5 | 23375.2506 | -2.0 |
| 44.5 | 43.5 | 23386.1599 | -1.9 | 13.5 | 13.5 | 23375.2863 | -0.8 |
| 45.5 | 44.5 | 23386.4628 | -1.7 | 14.5 | 14.5 | 23375.3224 | -1.7 |
| 46.5 | 45.5 | 23386.7664 | -2.8 | 15.5 | 15.5 | 23375.3641 | 0.4  |
| 47.5 | 46.5 | 23387.0746 | -1.3 | 16.5 | 16.5 | 23375.4054 | -0.3 |
| 48.5 | 47.5 | 23387.3821 | -2.6 | 17.5 | 17.5 | 23375.4494 | -0.9 |
| 49.5 | 48.5 | 23387.6920 | -3.5 | 18.5 | 18.5 | 23375.4955 | -1.8 |
| 50.5 | 49.5 | 23388.0057 | -2.6 | 19.5 | 19.5 | 23375.5438 | -3.1 |

|      |      |            |      |      |      |            |      |
|------|------|------------|------|------|------|------------|------|
| 51.5 | 50.5 | 23388.3204 | -2.6 | 20.5 | 20.5 | 23375.5942 | -4.7 |
| 52.5 | 51.5 | 23388.6370 | -2.6 | 21.5 | 21.5 | 23375.6472 | -6.2 |
| 53.5 | 52.5 | 23388.9542 | -4.0 | 22.5 | 22.5 | 23375.7093 | -1.0 |
| 54.5 | 53.5 | 23389.2764 | -2.3 | 23.5 | 23.5 | 23375.7677 | -2.0 |
| 55.5 | 54.5 | 23389.5990 | -2.0 | 24.5 | 24.5 | 23375.8304 | -1.2 |
| 56.5 | 55.5 | 23389.9225 | -2.6 | 25.5 | 25.5 | 23375.8948 | -1.1 |
| 57.5 | 56.5 | 23390.2502 | -0.9 | 26.5 | 26.5 | 23375.9584 | -4.2 |
| 58.5 | 57.5 | 23390.5771 | -1.8 | 27.5 | 27.5 | 23376.0304 | -1.3 |
| 59.5 | 58.5 | 23390.9053 | -3.1 | 28.5 | 28.5 | 23376.1029 | -0.3 |
| 60.5 | 59.5 | 23391.2406 | 1.0  | 29.5 | 29.5 | 23376.1775 | 0.4  |
| 61.5 | 60.5 | 23391.5735 | 0.9  | 30.5 | 30.5 | 23376.2547 | 1.3  |
| 62.5 | 61.5 | 23391.9080 | 0.8  | 31.5 | 31.5 | 23376.3337 | 1.7  |
| 63.5 | 62.5 | 23392.2453 | 1.8  | 32.5 | 32.5 | 23376.4124 | -0.6 |
| 65.5 | 64.5 | 23392.9287 | 7.9  | 33.5 | 33.5 | 23376.4982 | 1.9  |
| 66.5 | 65.5 | 23393.2673 | 5.4  | 34.5 | 34.5 | 23376.5806 | -1.3 |
| 2.5  | 3.5  | 23374.3716 | 1.3  | 35.5 | 35.5 | 23376.6683 | -1.6 |
| 3.5  | 4.5  | 23374.1881 | 2.4  | 36.5 | 36.5 | 23376.7620 | 1.9  |
| 4.5  | 5.5  | 23374.0064 | 2.7  | 37.5 | 37.5 | 23376.8531 | 0.5  |
| 5.5  | 6.5  | 23373.8248 | 0.6  | 38.5 | 38.5 | 23376.9495 | 2.1  |
| 6.5  | 7.5  | 23373.6451 | -2.3 | 39.5 | 39.5 | 23377.0422 | -2.2 |
| 7.5  | 8.5  | 23373.4706 | -2.5 | 40.5 | 40.5 | 23377.1433 | -0.3 |
| 8.5  | 9.5  | 23373.2981 | -3.2 | 41.5 | 41.5 | 23377.2444 | -0.6 |
| 9.5  | 10.5 | 23373.1314 | -0.7 | 42.5 | 42.5 | 23377.3498 | 1.2  |
| 10.5 | 11.5 | 23372.9633 | -2.2 | 43.5 | 43.5 | 23377.4545 | 0.1  |
| 11.5 | 12.5 | 23372.7985 | -2.9 | 44.5 | 44.5 | 23377.5626 | 0.3  |
| 12.5 | 13.5 | 23372.6390 | -0.9 | 45.5 | 45.5 | 23377.6690 | -3.4 |
| 13.5 | 14.5 | 23372.4809 | 0.0  | 46.5 | 46.5 | 23377.7817 | -2.8 |
| 14.5 | 15.5 | 23372.3211 | -3.3 | 47.5 | 47.5 | 23377.8968 | -2.0 |
| 15.5 | 16.5 | 23372.1690 | -1.5 | 48.5 | 48.5 | 23378.0129 | -2.2 |
| 16.5 | 17.5 | 23372.0156 | -3.6 | 49.5 | 49.5 | 23378.1320 | -1.5 |
| 17.5 | 18.5 | 23371.8695 | -0.8 | 50.5 | 50.5 | 23378.2537 | -0.2 |
| 18.5 | 19.5 | 23371.7217 | -2.2 | 51.5 | 51.5 | 23378.3739 | -2.5 |
| 19.5 | 20.5 | 23371.5793 | -0.8 | 52.5 | 52.5 | 23378.4999 | -0.9 |
| 20.5 | 21.5 | 23371.4405 | 1.7  | 53.5 | 53.5 | 23378.6236 | -3.5 |
| 21.5 | 22.5 | 23371.2998 | -0.1 | 54.5 | 54.5 | 23378.7497 | -5.7 |
| 22.5 | 23.5 | 23371.1660 | 2.4  | 55.5 | 55.5 | 23378.8828 | -2.8 |
| 23.5 | 24.5 | 23371.0316 | 1.9  | 57.5 | 57.5 | 23379.1473 | -4.4 |
| 24.5 | 25.5 | 23370.8978 | -0.5 | 59.5 | 59.5 | 23379.4245 | -0.7 |
| 25.5 | 26.5 | 23370.7677 | -1.6 | 60.5 | 60.5 | 23379.5646 | 0.0  |
| 26.5 | 27.5 | 23370.6450 | 2.2  | 61.5 | 61.5 | 23379.7044 | -1.4 |
| 27.5 | 28.5 | 23370.5189 | 0.2  | 62.5 | 62.5 | 23379.8508 | 2.1  |
| 28.5 | 29.5 | 23370.3968 | -0.3 | 64.5 | 64.5 | 23380.1421 | 2.4  |
| 29.5 | 30.5 | 23370.2771 | -0.8 | 65.5 | 65.5 | 23380.2945 | 6.9  |
| 30.5 | 31.5 | 23370.1613 | 0.3  | 66.5 | 66.5 | 23380.4473 | 10.1 |

[23.48]<sup>4</sup>Γ<sub>5/2</sub>-<sup>4</sup>Φ<sub>5/2</sub> (0,0)

| J'  | J'' | Observed   | O-C  | J'   | J''  | Observed   | O-C  |
|-----|-----|------------|------|------|------|------------|------|
| 3.5 | 2.5 | 23244.7788 | 0.7  | 11.5 | 12.5 | 23241.8271 | -0.1 |
| 4.5 | 3.5 | 23244.9796 | -2.8 | 12.5 | 13.5 | 23241.6673 | 4.7  |

|      |      |            |      |      |      |            |      |
|------|------|------------|------|------|------|------------|------|
| 5.5  | 4.5  | 23245.1918 | 2.8  | 13.5 | 14.5 | 23241.5028 | 2.4  |
| 6.5  | 5.5  | 23245.3979 | -0.1 | 14.5 | 15.5 | 23241.3411 | 0.6  |
| 7.5  | 6.5  | 23245.6107 | 1.4  | 15.5 | 16.5 | 23241.1846 | 1.8  |
| 8.5  | 7.5  | 23245.8212 | -1.7 | 16.5 | 17.5 | 23241.0292 | 1.7  |
| 9.5  | 8.5  | 23246.0400 | 1.1  | 17.5 | 18.5 | 23240.8754 | 0.9  |
| 11.5 | 10.5 | 23246.4783 | 0.6  | 18.5 | 19.5 | 23240.7273 | 3.6  |
| 12.5 | 11.5 | 23246.7031 | 2.5  | 19.5 | 20.5 | 23240.5769 | 1.6  |
| 13.5 | 12.5 | 23246.9276 | 1.9  | 20.5 | 21.5 | 23240.4311 | 2.0  |
| 14.5 | 13.5 | 23247.1544 | 1.2  | 21.5 | 22.5 | 23240.2893 | 4.1  |
| 15.5 | 14.5 | 23247.3829 | 0.0  | 22.5 | 23.5 | 23240.1466 | 3.1  |
| 16.5 | 15.5 | 23247.6148 | -0.1 | 23.5 | 24.5 | 23240.0058 | 1.7  |
| 17.5 | 16.5 | 23247.8513 | 2.2  | 24.5 | 25.5 | 23239.8734 | 6.4  |
| 18.5 | 17.5 | 23248.0851 | -0.5 | 25.5 | 26.5 | 23239.7370 | 4.9  |
| 19.5 | 18.5 | 23248.3293 | 4.9  | 26.5 | 27.5 | 23239.6029 | 3.5  |
| 20.5 | 19.5 | 23248.5668 | 1.4  | 27.5 | 28.5 | 23239.4732 | 4.3  |
| 21.5 | 20.5 | 23248.8119 | 3.3  | 28.5 | 29.5 | 23239.3411 | 0.5  |
| 22.5 | 21.5 | 23249.0567 | 2.6  | 29.5 | 30.5 | 23239.2177 | 3.1  |
| 23.5 | 22.5 | 23249.3022 | 0.5  | 30.5 | 31.5 | 23239.0952 | 4.5  |
| 24.5 | 23.5 | 23249.5527 | 1.1  | 31.5 | 32.5 | 23238.9718 | 2.9  |
| 25.5 | 24.5 | 23249.8076 | 4.0  | 32.5 | 33.5 | 23238.8537 | 4.3  |
| 26.5 | 25.5 | 23250.0588 | 1.0  | 33.5 | 34.5 | 23238.7363 | 4.4  |
| 27.5 | 26.5 | 23250.3153 | 1.1  | 34.5 | 35.5 | 23238.6179 | 1.3  |
| 28.5 | 27.5 | 23250.5748 | 2.1  | 35.5 | 36.5 | 23238.5072 | 3.8  |
| 29.5 | 28.5 | 23250.8346 | 1.2  | 36.5 | 37.5 | 23238.3947 | 2.3  |
| 30.5 | 29.5 | 23251.0968 | 0.7  | 37.5 | 38.5 | 23238.2863 | 2.9  |
| 31.5 | 30.5 | 23251.3627 | 1.7  | 38.5 | 39.5 | 23238.1796 | 3.1  |
| 32.5 | 31.5 | 23251.6305 | 2.5  | 39.5 | 40.5 | 23238.0752 | 3.6  |
| 33.5 | 32.5 | 23251.9000 | 2.9  | 40.5 | 41.5 | 23237.9705 | 1.7  |
| 34.5 | 33.5 | 23252.1706 | 2.4  | 41.5 | 42.5 | 23237.8701 | 2.1  |
| 35.5 | 34.5 | 23252.4444 | 3.0  | 42.5 | 43.5 | 23237.7727 | 3.5  |
| 36.5 | 35.5 | 23252.7189 | 2.3  | 43.5 | 44.5 | 23237.6722 | -0.2 |
| 37.5 | 36.5 | 23252.9958 | 2.0  | 44.5 | 45.5 | 23237.5785 | 0.9  |
| 38.5 | 37.5 | 23253.2801 | 7.1  | 45.5 | 46.5 | 23237.4861 | 1.4  |
| 39.5 | 38.5 | 23253.5552 | 1.0  | 46.5 | 47.5 | 23237.3927 | -1.1 |
| 40.5 | 39.5 | 23253.8397 | 2.3  | 47.5 | 48.5 | 23237.3057 | 0.9  |
| 41.5 | 40.5 | 23254.1209 | -1.6 | 48.5 | 49.5 | 23237.2193 | 1.6  |
| 42.5 | 41.5 | 23254.4101 | 0.6  | 49.5 | 50.5 | 23237.1335 | 1.0  |
| 43.5 | 42.5 | 23254.7013 | 2.8  | 50.5 | 51.5 | 23237.0495 | 0.4  |
| 44.5 | 43.5 | 23254.9922 | 2.9  | 51.5 | 52.5 | 23236.9661 | -1.5 |
| 45.5 | 44.5 | 23255.2831 | 1.1  | 52.5 | 53.5 | 23236.8904 | 2.5  |
| 46.5 | 45.5 | 23255.5773 | 0.8  | 53.5 | 54.5 | 23236.8093 | -0.7 |
| 47.5 | 46.5 | 23255.8744 | 1.5  | 54.5 | 55.5 | 23236.7311 | -2.8 |
| 48.5 | 47.5 | 23256.1702 | -0.9 | 55.5 | 56.5 | 23236.6569 | -2.6 |
| 50.5 | 49.5 | 23256.7710 | -1.8 | 56.5 | 57.5 | 23236.5848 | -2.0 |
| 51.5 | 50.5 | 23257.0782 | 1.9  | 57.5 | 58.5 | 23236.5154 | -0.5 |
| 52.5 | 51.5 | 23257.3784 | -3.1 | 58.5 | 59.5 | 23236.4461 | -0.5 |
| 53.5 | 52.5 | 23257.6842 | -4.1 | 59.5 | 60.5 | 23236.3787 | -0.4 |
| 54.5 | 53.5 | 23257.9952 | -1.7 | 60.5 | 61.5 | 23236.3163 | 3.2  |
| 55.5 | 54.5 | 23258.3047 | -2.4 | 6.5  | 6.5  | 23244.1390 | 0.6  |

|      |      |            |      |      |      |            |      |
|------|------|------------|------|------|------|------------|------|
| 56.5 | 55.5 | 23258.6183 | -0.6 | 7.5  | 7.5  | 23244.1574 | 1.5  |
| 57.5 | 56.5 | 23258.9328 | 0.5  | 8.5  | 8.5  | 23244.1764 | 0.6  |
| 58.5 | 57.5 | 23259.2460 | -1.3 | 9.5  | 9.5  | 23244.1974 | -0.6 |
| 59.5 | 58.5 | 23259.5649 | 1.0  | 10.5 | 10.5 | 23244.2228 | 0.3  |
| 60.5 | 59.5 | 23259.8845 | 2.6  | 11.5 | 11.5 | 23244.2494 | 0.1  |
| 3.5  | 4.5  | 23243.2337 | 6.0  | 12.5 | 12.5 | 23244.2788 | 0.3  |
| 4.5  | 5.5  | 23243.0452 | 0.7  | 13.5 | 13.5 | 23244.3091 | -0.8 |
| 5.5  | 6.5  | 23242.8711 | 7.5  | 14.5 | 14.5 | 23244.3408 | -2.8 |
| 6.5  | 7.5  | 23242.6867 | 1.7  | 15.5 | 15.5 | 23244.3802 | 0.5  |
| 7.5  | 8.5  | 23242.5112 | 2.4  | 16.5 | 16.5 | 23244.4149 | -3.1 |
| 8.5  | 9.5  | 23242.3397 | 4.8  | 17.5 | 17.5 | 23244.4580 | -0.6 |
| 9.5  | 10.5 | 23242.1666 | 3.3  | 18.5 | 18.5 | 23244.5020 | 0.5  |
| 10.5 | 11.5 | 23241.9935 | -0.6 |      |      |            |      |

[23.48]<sup>4</sup>Γ<sub>7/2</sub>-<sup>4</sup>Φ<sub>5/2</sub> (0,0)

| J'   | J''  | Observed   | O-C  | J'   | J''  | Observed   | O-C  |
|------|------|------------|------|------|------|------------|------|
| 3.5  | 2.5  | 23448.2233 | -4.4 | 22.5 | 23.5 | 23444.0743 | 1.5  |
| 4.5  | 3.5  | 23448.4418 | 1.3  | 23.5 | 24.5 | 23443.9796 | 2.2  |
| 5.5  | 4.5  | 23448.6523 | -5.1 | 24.5 | 25.5 | 23443.8895 | 3.5  |
| 6.5  | 5.5  | 23448.8754 | -3.2 | 25.5 | 26.5 | 23443.7994 | 0.7  |
| 7.5  | 6.5  | 23449.0996 | -4.3 | 26.5 | 27.5 | 23443.7164 | 0.8  |
| 8.5  | 7.5  | 23449.3289 | -4.5 | 27.5 | 28.5 | 23443.6400 | 3.5  |
| 9.5  | 8.5  | 23449.5626 | -4.5 | 28.5 | 29.5 | 23443.5653 | 3.8  |
| 12.5 | 11.5 | 23450.2938 | 0.5  | 29.5 | 30.5 | 23443.4919 | 1.4  |
| 13.5 | 12.5 | 23450.5443 | 0.6  | 30.5 | 31.5 | 23443.4232 | -0.4 |
| 14.5 | 13.5 | 23450.7987 | 0.4  | 31.5 | 32.5 | 23443.3631 | 2.4  |
| 15.5 | 14.5 | 23451.0583 | 1.3  | 32.5 | 33.5 | 23443.3018 | 0.0  |
| 16.5 | 15.5 | 23451.3177 | -2.1 | 33.5 | 34.5 | 23443.2481 | 1.2  |
| 17.5 | 16.5 | 23451.5876 | 0.8  | 34.5 | 35.5 | 23443.1957 | -0.4 |
| 18.5 | 17.5 | 23451.8598 | 1.9  | 35.5 | 36.5 | 23443.1502 | 1.0  |
| 19.5 | 18.5 | 23452.1340 | 0.9  | 36.5 | 37.5 | 23443.1060 | -0.2 |
| 20.5 | 19.5 | 23452.4116 | -0.8 | 37.5 | 38.5 | 23443.0636 | -3.6 |
| 21.5 | 20.5 | 23452.6971 | 1.2  | 38.5 | 39.5 | 23443.0296 | -2.6 |
| 22.5 | 21.5 | 23452.9886 | 5.2  | 4.5  | 4.5  | 23447.5657 | -2.7 |
| 23.5 | 22.5 | 23453.2805 | 5.6  | 5.5  | 5.5  | 23447.5874 | -4.2 |
| 24.5 | 23.5 | 23453.5744 | 3.8  | 6.5  | 6.5  | 23447.6194 | 0.5  |
| 25.5 | 24.5 | 23453.8759 | 5.6  | 7.5  | 7.5  | 23447.6494 | -1.1 |
| 26.5 | 25.5 | 23454.1771 | 3.1  | 8.5  | 8.5  | 23447.6834 | -2.9 |
| 27.5 | 26.5 | 23454.4877 | 5.9  | 9.5  | 9.5  | 23447.7251 | -1.1 |
| 28.5 | 27.5 | 23454.7975 | 4.0  | 10.5 | 10.5 | 23447.7695 | -0.9 |
| 29.5 | 28.5 | 23455.1124 | 3.1  | 11.5 | 11.5 | 23447.8175 | -1.2 |
| 30.5 | 29.5 | 23455.4330 | 3.9  | 12.5 | 12.5 | 23447.8702 | -1.0 |
| 31.5 | 30.5 | 23455.7559 | 3.1  | 13.5 | 13.5 | 23447.9269 | -1.0 |
| 32.5 | 31.5 | 23456.0814 | 0.9  | 14.5 | 14.5 | 23447.9896 | 0.8  |
| 33.5 | 32.5 | 23456.4140 | 1.9  | 15.5 | 15.5 | 23448.0572 | 3.4  |
| 34.5 | 33.5 | 23456.7476 | 0.0  | 16.5 | 16.5 | 23448.1259 | 2.9  |
| 35.5 | 34.5 | 23457.0877 | 0.6  | 17.5 | 17.5 | 23448.1990 | 2.7  |
| 36.5 | 35.5 | 23457.4293 | -1.1 | 18.5 | 18.5 | 23448.2754 | 1.6  |
| 37.5 | 36.5 | 23457.7782 | 0.5  | 19.5 | 19.5 | 23448.3571 | 1.7  |

|      |      |            |      |      |      |            |      |
|------|------|------------|------|------|------|------------|------|
| 38.5 | 37.5 | 23458.1267 | -2.0 | 20.5 | 20.5 | 23448.4418 | 0.7  |
| 39.5 | 38.5 | 23458.4817 | -2.0 | 21.5 | 21.5 | 23448.5329 | 2.0  |
| 40.5 | 39.5 | 23458.8359 | -6.5 | 22.5 | 22.5 | 23448.6279 | 3.0  |
| 41.5 | 40.5 | 23459.1988 | -6.2 | 23.5 | 23.5 | 23448.7260 | 3.1  |
| 5.5  | 6.5  | 23446.3292 | -2.8 | 24.5 | 24.5 | 23448.8301 | 5.1  |
| 6.5  | 7.5  | 23446.1607 | -4.9 | 25.5 | 25.5 | 23448.9348 | 3.6  |
| 7.5  | 8.5  | 23445.9980 | -5.4 | 26.5 | 26.5 | 23449.0436 | 2.1  |
| 8.5  | 9.5  | 23445.8388 | -6.6 | 27.5 | 27.5 | 23449.1580 | 2.2  |
| 9.5  | 10.5 | 23445.6867 | -4.9 | 28.5 | 28.5 | 23449.2790 | 4.8  |
| 10.5 | 11.5 | 23445.5363 | -5.7 | 29.5 | 29.5 | 23449.3950 | -1.6 |
| 11.5 | 12.5 | 23445.3909 | -5.7 | 30.5 | 30.5 | 23449.5242 | 1.2  |
| 12.5 | 13.5 | 23445.2514 | -4.0 | 31.5 | 31.5 | 23449.6550 | 1.6  |
| 13.5 | 14.5 | 23445.1187 | 0.3  | 33.5 | 33.5 | 23449.9289 | 2.8  |
| 14.5 | 15.5 | 23444.9873 | 1.7  | 34.5 | 34.5 | 23450.0673 | -1.1 |
| 15.5 | 16.5 | 23444.8545 | -2.4 | 35.5 | 35.5 | 23450.2154 | 0.7  |
| 16.5 | 17.5 | 23444.7321 | -0.4 | 36.5 | 36.5 | 23450.3635 | -1.4 |
| 17.5 | 18.5 | 23444.6113 | -0.8 | 37.5 | 37.5 | 23450.5196 | 0.6  |
| 18.5 | 19.5 | 23444.4966 | 0.6  | 38.5 | 38.5 | 23450.6730 | -4.0 |
| 19.5 | 20.5 | 23444.3855 | 1.5  | 39.5 | 39.5 | 23450.8355 | -3.4 |
| 20.5 | 21.5 | 23444.2768 | 0.7  | 40.5 | 40.5 | 23451.0012 | -3.4 |
| 21.5 | 22.5 | 23444.1707 | -1.7 |      |      |            |      |

| [23.48] <sup>4</sup> Γ <sub>7/2</sub> <sup>-4</sup> Φ <sub>7/2</sub> (0,0) |      |            |      |      |      |            |      |
|----------------------------------------------------------------------------|------|------------|------|------|------|------------|------|
| J'                                                                         | J''  | Observed   | O-C  | J'   | J''  | Observed   | O-C  |
| 5.5                                                                        | 4.5  | 23317.7963 | -3.3 | 11.5 | 12.5 | 23314.5200 | -2.5 |
| 6.5                                                                        | 5.5  | 23318.0162 | -3.3 | 12.5 | 13.5 | 23314.3765 | -1.7 |
| 7.5                                                                        | 6.5  | 23318.2418 | -1.5 | 13.5 | 14.5 | 23314.2384 | 0.5  |
| 8.5                                                                        | 7.5  | 23318.4701 | -1.1 | 14.5 | 15.5 | 23314.1017 | 0.1  |
| 9.5                                                                        | 8.5  | 23318.7016 | -1.3 | 15.5 | 16.5 | 23313.9682 | -1.0 |
| 10.5                                                                       | 9.5  | 23318.9347 | -4.0 | 16.5 | 17.5 | 23313.8402 | -0.6 |
| 11.5                                                                       | 10.5 | 23319.1802 | 1.8  | 17.5 | 18.5 | 23313.7171 | 0.8  |
| 12.5                                                                       | 11.5 | 23319.4230 | 1.0  | 18.5 | 19.5 | 23313.5957 | -0.1 |
| 13.5                                                                       | 12.5 | 23319.6675 | -2.1 | 19.5 | 20.5 | 23313.4799 | 0.8  |
| 14.5                                                                       | 13.5 | 23319.9210 | -0.1 | 20.5 | 21.5 | 23313.3685 | 2.1  |
| 15.5                                                                       | 14.5 | 23320.1778 | 1.3  | 21.5 | 22.5 | 23313.2608 | 3.2  |
| 16.5                                                                       | 15.5 | 23320.4357 | -0.2 | 22.5 | 23.5 | 23313.1567 | 3.9  |
| 17.5                                                                       | 16.5 | 23320.6975 | -1.6 | 23.5 | 24.5 | 23313.0563 | 4.5  |
| 18.5                                                                       | 17.5 | 23320.9671 | 0.8  | 24.5 | 25.5 | 23312.9559 | 1.3  |
| 19.5                                                                       | 18.5 | 23321.2396 | 2.3  | 25.5 | 26.5 | 23312.8611 | -0.3 |
| 20.5                                                                       | 19.5 | 23321.5161 | 3.9  | 26.5 | 27.5 | 23312.7734 | 1.4  |
| 21.5                                                                       | 20.5 | 23321.7940 | 3.0  | 27.5 | 28.5 | 23312.6880 | 1.5  |
| 22.5                                                                       | 21.5 | 23322.0782 | 4.5  | 28.5 | 29.5 | 23312.6080 | 3.1  |
| 23.5                                                                       | 22.5 | 23322.3637 | 3.5  | 29.5 | 30.5 | 23312.5279 | 0.9  |
| 24.5                                                                       | 23.5 | 23322.6539 | 3.4  | 30.5 | 31.5 | 23312.4542 | 1.2  |
| 25.5                                                                       | 24.5 | 23322.9481 | 3.4  | 31.5 | 32.5 | 23312.3825 | -0.3 |
| 26.5                                                                       | 25.5 | 23323.2450 | 2.4  | 32.5 | 33.5 | 23312.3174 | 1.0  |
| 27.5                                                                       | 26.5 | 23323.5488 | 4.4  | 33.5 | 34.5 | 23312.2531 | -0.7 |
| 28.5                                                                       | 27.5 | 23323.8537 | 3.7  | 34.5 | 35.5 | 23312.1927 | -2.2 |
| 29.5                                                                       | 28.5 | 23324.1641 | 4.8  | 35.5 | 36.5 | 23312.1350 | -4.8 |

|      |      |            |       |      |      |            |      |
|------|------|------------|-------|------|------|------------|------|
| 30.5 | 29.5 | 23324.4777 | 5.3   | 36.5 | 37.5 | 23312.0833 | -5.2 |
| 31.5 | 30.5 | 23324.7915 | 2.2   | 37.5 | 38.5 | 23312.0402 | -0.6 |
| 32.5 | 31.5 | 23325.1131 | 3.2   | 38.5 | 39.5 | 23311.9932 | -3.7 |
| 33.5 | 32.5 | 23325.4380 | 3.8   | 39.5 | 40.5 | 23311.9505 | -6.2 |
| 34.5 | 33.5 | 23325.7642 | 2.0   | 4.5  | 4.5  | 23316.7075 | -3.1 |
| 35.5 | 34.5 | 23326.0925 | -1.4  | 5.5  | 5.5  | 23316.7312 | -1.3 |
| 36.5 | 35.5 | 23326.4297 | 0.4   | 6.5  | 6.5  | 23316.7566 | -1.8 |
| 37.5 | 36.5 | 23326.7636 | -4.7  | 7.5  | 7.5  | 23316.7882 | -0.1 |
| 38.5 | 37.5 | 23327.1060 | -5.0  | 8.5  | 8.5  | 23316.8229 | 0.8  |
| 39.5 | 38.5 | 23327.4509 | -6.3  | 9.5  | 9.5  | 23316.8603 | 0.4  |
| 40.5 | 39.5 | 23327.7982 | -8.9  | 10.5 | 10.5 | 23316.9010 | -0.7 |
| 3.5  | 4.5  | 23315.8216 | 2.0   | 11.5 | 11.5 | 23316.9497 | 2.3  |
| 4.5  | 5.5  | 23315.6408 | -2.7  | 12.5 | 12.5 | 23316.9977 | 0.6  |
| 5.5  | 6.5  | 23315.4700 | -1.4  | 13.5 | 13.5 | 23317.0541 | 3.4  |
| 6.5  | 7.5  | 23315.2999 | -3.4  | 14.5 | 14.5 | 23317.1151 | 6.8  |
| 7.5  | 8.5  | 23315.1378 | -1.4  | 15.5 | 15.5 | 23317.1678 | -2.0 |
| 8.5  | 9.5  | 23314.9810 | 2.0   | 16.5 | 16.5 | 23317.2359 | 0.6  |
| 9.5  | 10.5 | 23314.8216 | -1.3  | 17.5 | 17.5 | 23317.3043 | -0.3 |
| 10.5 | 11.5 | 23314.6587 | -12.0 |      |      |            |      |

[23.48]<sup>4</sup>Γ<sub>9/2</sub><sup>-4</sup>Φ<sub>7/2</sub>(0,0)

| J'   | J''  | Observed   | O-C  | J'   | J''  | Observed   | O-C   |
|------|------|------------|------|------|------|------------|-------|
| 4.5  | 3.5  | 23527.4443 | 3.8  | 13.5 | 13.5 | 23527.0661 | -3.4  |
| 5.5  | 4.5  | 23527.6694 | 2.6  | 14.5 | 14.5 | 23527.1505 | -4.0  |
| 6.5  | 5.5  | 23527.9006 | 1.5  | 15.5 | 15.5 | 23527.2403 | -5.0  |
| 7.5  | 6.5  | 23528.1371 | -0.1 | 16.5 | 16.5 | 23527.3376 | -4.3  |
| 8.5  | 7.5  | 23528.3821 | 1.0  | 17.5 | 17.5 | 23527.4443 | 0.1   |
| 9.5  | 8.5  | 23528.6344 | 3.5  | 18.5 | 18.5 | 23527.5524 | 0.1   |
| 10.5 | 9.5  | 23528.8880 | 1.5  | 19.5 | 19.5 | 23527.6694 | 3.2   |
| 11.5 | 10.5 | 23529.1512 | 3.2  | 20.5 | 20.5 | 23527.7849 | -1.0  |
| 12.5 | 11.5 | 23529.4157 | 0.4  | 21.5 | 21.5 | 23527.9093 | -1.9  |
| 13.5 | 12.5 | 23529.6915 | 3.1  | 22.5 | 22.5 | 23528.0382 | -4.1  |
| 14.5 | 13.5 | 23529.9694 | 2.1  | 23.5 | 23.5 | 23528.1781 | -0.9  |
| 15.5 | 14.5 | 23530.2572 | 5.2  | 24.5 | 24.5 | 23528.3182 | -3.3  |
| 16.5 | 15.5 | 23530.5497 | 7.3  | 25.5 | 25.5 | 23528.4693 | -0.3  |
| 17.5 | 16.5 | 23530.8453 | 6.6  | 26.5 | 26.5 | 23528.6192 | -4.1  |
| 18.5 | 17.5 | 23531.1448 | 4.1  | 27.5 | 27.5 | 23528.7802 | -2.5  |
| 19.5 | 18.5 | 23531.4527 | 4.3  | 28.5 | 28.5 | 23528.9487 | 1.0   |
| 20.5 | 19.5 | 23531.7703 | 8.4  | 29.5 | 29.5 | 23529.1144 | -3.8  |
| 21.5 | 20.5 | 23532.0861 | 5.1  | 30.5 | 30.5 | 23529.2899 | -4.4  |
| 22.5 | 21.5 | 23532.4120 | 6.1  | 31.5 | 31.5 | 23529.4737 | -2.3  |
| 23.5 | 22.5 | 23532.7439 | 7.5  | 32.5 | 32.5 | 23529.6605 | -2.7  |
| 24.5 | 23.5 | 23533.0768 | 4.2  | 33.5 | 33.5 | 23529.8410 | -14.8 |
| 25.5 | 24.5 | 23533.4181 | 3.7  | 34.5 | 34.5 | 23530.0574 | 3.4   |
| 26.5 | 25.5 | 23533.7660 | 4.2  | 35.5 | 35.5 | 23530.2572 | -0.3  |
| 27.5 | 26.5 | 23534.1169 | 2.1  | 5.5  | 6.5  | 23525.3386 | -0.1  |
| 28.5 | 27.5 | 23534.4781 | 4.7  | 6.5  | 7.5  | 23525.1828 | -0.1  |
| 29.5 | 28.5 | 23534.8444 | 6.8  | 7.5  | 8.5  | 23525.0324 | -0.6  |
| 30.5 | 29.5 | 23535.2117 | 4.4  | 8.5  | 9.5  | 23524.8893 | 0.3   |

|      |      |            |      |      |      |            |      |
|------|------|------------|------|------|------|------------|------|
| 31.5 | 30.5 | 23535.5826 | 0.1  | 9.5  | 10.5 | 23524.7469 | -3.9 |
| 32.5 | 31.5 | 23535.9622 | -1.0 | 10.5 | 11.5 | 23524.6171 | -1.4 |
| 33.5 | 32.5 | 23536.3511 | 1.8  | 11.5 | 12.5 | 23524.4920 | -0.1 |
| 34.5 | 33.5 | 23536.7417 | 0.8  | 12.5 | 13.5 | 23524.3703 | -1.2 |
| 35.5 | 34.5 | 23537.1373 | -0.6 | 13.5 | 14.5 | 23524.2545 | -2.2 |
| 36.5 | 35.5 | 23537.5413 | 1.0  | 14.5 | 15.5 | 23524.1458 | -2.0 |
| 37.5 | 36.5 | 23537.9499 | 1.9  | 15.5 | 16.5 | 23524.0457 | 1.0  |
| 38.5 | 37.5 | 23538.3622 | 1.1  | 16.5 | 17.5 | 23523.9456 | -1.8 |
| 39.5 | 38.5 | 23538.7815 | 2.0  | 17.5 | 18.5 | 23523.8539 | -2.0 |
| 4.5  | 4.5  | 23526.5611 | -6.3 | 18.5 | 19.5 | 23523.7685 | -1.7 |
| 5.5  | 5.5  | 23526.5975 | -2.3 | 19.5 | 20.5 | 23523.6888 | -1.4 |
| 6.5  | 6.5  | 23526.6395 | 1.5  | 20.5 | 21.5 | 23523.6137 | -2.4 |
| 7.5  | 7.5  | 23526.6809 | -1.2 | 21.5 | 22.5 | 23523.5454 | -2.2 |
| 8.5  | 8.5  | 23526.7332 | 1.2  | 22.5 | 23.5 | 23523.4827 | -2.2 |
| 9.5  | 9.5  | 23526.7866 | -1.2 | 23.5 | 24.5 | 23523.4266 | -1.4 |
| 10.5 | 10.5 | 23526.8480 | -1.5 | 24.5 | 25.5 | 23523.3705 | -6.2 |
| 11.5 | 11.5 | 23526.9147 | -2.3 | 25.5 | 26.5 | 23523.3215 | -9.6 |
| 12.5 | 12.5 | 23526.9844 | -6.0 |      |      |            |      |

[23.61]<sup>4</sup>Γ<sub>5/2</sub>-<sup>4</sup>Φ<sub>3/2</sub> (0,0)

| J'   | J''  | Observed   | O-C  | J'   | J''  | Observed   | O-C  |
|------|------|------------|------|------|------|------------|------|
| 2.5  | 1.5  | 23499.8457 | -1.5 | 15.5 | 16.5 | 23496.8997 | 2.0  |
| 3.5  | 2.5  | 23500.0659 | 4.5  | 16.5 | 17.5 | 23496.8017 | 0.1  |
| 4.5  | 3.5  | 23500.2840 | 2.6  | 17.5 | 18.5 | 23496.7123 | 0.8  |
| 5.5  | 4.5  | 23500.5142 | 6.9  | 18.5 | 19.5 | 23496.6266 | -0.8 |
| 6.5  | 5.5  | 23500.7428 | 3.7  | 19.5 | 20.5 | 23496.5485 | -0.8 |
| 7.5  | 6.5  | 23500.9846 | 7.8  | 20.5 | 21.5 | 23496.4799 | 2.8  |
| 8.5  | 7.5  | 23501.2244 | 4.0  | 21.5 | 22.5 | 23496.4084 | -2.6 |
| 9.5  | 8.5  | 23501.4732 | 3.4  | 22.5 | 23.5 | 23496.3490 | -1.8 |
| 10.5 | 9.5  | 23501.7264 | 1.2  | 23.5 | 24.5 | 23496.2980 | 1.3  |
| 11.5 | 10.5 | 23501.9902 | 3.7  | 24.5 | 25.5 | 23496.2486 | 0.0  |
| 12.5 | 11.5 | 23502.2585 | 4.9  | 25.5 | 26.5 | 23496.2066 | 0.1  |
| 13.5 | 12.5 | 23502.5313 | 4.6  | 26.5 | 27.5 | 23496.1746 | 4.1  |
| 14.5 | 13.5 | 23502.8098 | 4.1  | 27.5 | 28.5 | 23496.1406 | 0.0  |
| 15.5 | 14.5 | 23503.0934 | 2.9  | 28.5 | 29.5 | 23496.1202 | 3.5  |
| 16.5 | 15.5 | 23503.3849 | 3.5  | 2.5  | 2.5  | 23499.3593 | -4.0 |
| 17.5 | 16.5 | 23503.6791 | 1.0  | 3.5  | 3.5  | 23499.3869 | 3.0  |
| 18.5 | 17.5 | 23503.9857 | 4.9  | 4.5  | 4.5  | 23499.4061 | -4.3 |
| 19.5 | 18.5 | 23504.2932 | 3.8  | 5.5  | 5.5  | 23499.4395 | -3.2 |
| 20.5 | 19.5 | 23504.6091 | 5.1  | 6.5  | 6.5  | 23499.4785 | -2.5 |
| 21.5 | 20.5 | 23504.9266 | 2.1  | 7.5  | 7.5  | 23499.5256 | 0.5  |
| 22.5 | 21.5 | 23505.2526 | 1.6  | 8.5  | 8.5  | 23499.5763 | 1.1  |
| 23.5 | 22.5 | 23505.5845 | 1.1  | 9.5  | 9.5  | 23499.6326 | 1.5  |
| 24.5 | 23.5 | 23505.9234 | 1.5  | 10.5 | 10.5 | 23499.6947 | 1.8  |
| 25.5 | 24.5 | 23506.2657 | -0.6 | 11.5 | 11.5 | 23499.7611 | 0.4  |
| 26.5 | 25.5 | 23506.6149 | -1.9 | 12.5 | 12.5 | 23499.8366 | 2.3  |
| 27.5 | 26.5 | 23506.9725 | -0.7 | 13.5 | 13.5 | 23499.9142 | 0.3  |
| 28.5 | 27.5 | 23507.3351 | -0.6 | 14.5 | 14.5 | 23500.0009 | 1.5  |
| 29.5 | 28.5 | 23507.7023 | -2.0 | 15.5 | 15.5 | 23500.0963 | 5.5  |

|      |      |            |      |      |      |            |      |
|------|------|------------|------|------|------|------------|------|
| 30.5 | 29.5 | 23508.0759 | -2.9 | 16.5 | 16.5 | 23500.1927 | 4.5  |
| 31.5 | 30.5 | 23508.4579 | -1.6 | 17.5 | 17.5 | 23500.2948 | 3.3  |
| 32.5 | 31.5 | 23508.8448 | -1.4 | 18.5 | 18.5 | 23500.4055 | 4.7  |
| 33.5 | 32.5 | 23509.2367 | -2.3 | 19.5 | 19.5 | 23500.5186 | 2.6  |
| 34.5 | 33.5 | 23509.6370 | -0.9 | 20.5 | 20.5 | 23500.6417 | 4.5  |
| 35.5 | 34.5 | 23510.0453 | 2.4  | 21.5 | 21.5 | 23500.7674 | 3.0  |
| 36.5 | 35.5 | 23510.4549 | 0.9  | 22.5 | 22.5 | 23500.9015 | 4.0  |
| 37.5 | 36.5 | 23510.8729 | 1.6  | 23.5 | 23.5 | 23501.0403 | 3.6  |
| 38.5 | 37.5 | 23511.2938 | -1.0 | 24.5 | 24.5 | 23501.1837 | 1.8  |
| 39.5 | 38.5 | 23511.7255 | 1.1  | 25.5 | 25.5 | 23501.3308 | -2.2 |
| 40.5 | 39.5 | 23512.1611 | 0.9  | 26.5 | 26.5 | 23501.4923 | 2.1  |
| 41.5 | 40.5 | 23512.6044 | 2.2  | 27.5 | 27.5 | 23501.6537 | 0.2  |
| 2.5  | 3.5  | 23498.6865 | 0.7  | 28.5 | 28.5 | 23501.8218 | -1.0 |
| 3.5  | 4.5  | 23498.5133 | 0.4  | 29.5 | 29.5 | 23501.9990 | 0.8  |
| 4.5  | 5.5  | 23498.3456 | -0.2 | 30.5 | 30.5 | 23502.1877 | 8.1  |
| 5.5  | 6.5  | 23498.1845 | -0.1 | 31.5 | 31.5 | 23502.3706 | 3.5  |
| 6.5  | 7.5  | 23498.0331 | 3.8  | 32.5 | 32.5 | 23502.5627 | 1.9  |
| 7.5  | 8.5  | 23497.8791 | -0.8 | 33.5 | 33.5 | 23502.7667 | 6.2  |
| 8.5  | 9.5  | 23497.7390 | 2.6  | 34.5 | 34.5 | 23502.9713 | 4.9  |
| 9.5  | 10.5 | 23497.6019 | 3.1  | 35.5 | 35.5 | 23503.1784 | -0.1 |
| 10.5 | 11.5 | 23497.4685 | 1.4  | 36.5 | 36.5 | 23503.3989 | 2.2  |
| 11.5 | 12.5 | 23497.3431 | 1.7  | 37.5 | 37.5 | 23503.6237 | 2.6  |
| 12.5 | 13.5 | 23497.2213 | -0.3 | 38.5 | 38.5 | 23503.8569 | 5.3  |
| 13.5 | 14.5 | 23497.1069 | -0.8 | 39.5 | 39.5 | 23504.0951 | 6.7  |
| 14.5 | 15.5 | 23497.0000 | 0.3  | 40.5 | 40.5 | 23504.3349 | 3.5  |

[23.61]<sup>4</sup>Γ<sub>5/2</sub>-<sup>4</sup>Φ<sub>5/2</sub> (0,0)

| J'   | J''  | Observed   | O-C  | J'   | J''  | Observed   | O-C  |
|------|------|------------|------|------|------|------------|------|
| 9.5  | 8.5  | 23370.5015 | -4.1 | 5.5  | 6.5  | 23367.2267 | 2.8  |
| 10.5 | 9.5  | 23370.7527 | -6.1 | 6.5  | 7.5  | 23367.0689 | 2.0  |
| 11.5 | 10.5 | 23371.0112 | -6.5 | 7.5  | 8.5  | 23366.9170 | 1.4  |
| 12.5 | 11.5 | 23371.2764 | -5.8 | 8.5  | 9.5  | 23366.7699 | -0.1 |
| 13.5 | 12.5 | 23371.5439 | -8.6 | 9.5  | 10.5 | 23366.6326 | 2.6  |
| 14.5 | 13.5 | 23371.8201 | -8.3 | 10.5 | 11.5 | 23366.4965 | 0.7  |
| 15.5 | 14.5 | 23372.1021 | -7.9 | 11.5 | 12.5 | 23366.3697 | 2.5  |
| 16.5 | 15.5 | 23372.3906 | -6.8 | 12.5 | 13.5 | 23366.2442 | -0.1 |
| 17.5 | 16.5 | 23372.6818 | -8.6 | 13.5 | 14.5 | 23366.1255 | -1.7 |
| 18.5 | 17.5 | 23372.9810 | -8.1 | 14.5 | 15.5 | 23366.0149 | -0.8 |
| 19.5 | 18.5 | 23373.2914 | -2.2 | 15.5 | 16.5 | 23365.9101 | 0.1  |
| 20.5 | 19.5 | 23373.6019 | -1.8 | 16.5 | 17.5 | 23365.8097 | -0.3 |
| 21.5 | 20.5 | 23373.9195 | -0.1 | 17.5 | 18.5 | 23365.7176 | 1.9  |
| 22.5 | 21.5 | 23374.2381 | -3.2 | 18.5 | 19.5 | 23365.6279 | 0.7  |
| 23.5 | 22.5 | 23374.5667 | -2.0 | 19.5 | 20.5 | 23365.5452 | 0.8  |
| 24.5 | 23.5 | 23374.9019 | 0.0  | 20.5 | 21.5 | 23365.4664 | -1.0 |
| 25.5 | 24.5 | 23375.2344 | -6.4 | 21.5 | 22.5 | 23365.3950 | -1.2 |
| 26.5 | 25.5 | 23375.5819 | -3.6 | 22.5 | 23.5 | 23365.3307 | -0.1 |
| 27.5 | 26.5 | 23375.9348 | -1.2 | 23.5 | 24.5 | 23365.2703 | -0.8 |
| 28.5 | 27.5 | 23376.2880 | -4.3 | 24.5 | 25.5 | 23365.2160 | -1.3 |
| 29.5 | 28.5 | 23376.6509 | -3.5 | 25.5 | 26.5 | 23365.1682 | -1.1 |

|      |      |            |      |      |      |            |      |
|------|------|------------|------|------|------|------------|------|
| 30.5 | 29.5 | 23377.0176 | -4.8 | 26.5 | 27.5 | 23365.1265 | -0.6 |
| 31.5 | 30.5 | 23377.3912 | -5.0 | 27.5 | 28.5 | 23365.0814 | -9.3 |
| 32.5 | 31.5 | 23377.7752 | -0.6 | 28.5 | 29.5 | 23365.0588 | -1.4 |
| 33.5 | 32.5 | 23378.1560 | -5.3 | 29.5 | 30.5 | 23365.0321 | -3.5 |
| 34.5 | 33.5 | 23378.5509 | -1.8 | 30.5 | 31.5 | 23365.0086 | -8.3 |
| 35.5 | 34.5 | 23378.9492 | -0.7 | 2.5  | 2.5  | 23368.4055 | -1.7 |
| 36.5 | 35.5 | 23379.3521 | -1.0 | 3.5  | 3.5  | 23368.4258 | -1.2 |
| 37.5 | 36.5 | 23379.7594 | -2.8 | 4.5  | 4.5  | 23368.4498 | -2.6 |
| 38.5 | 37.5 | 23380.1745 | -2.8 | 5.5  | 5.5  | 23368.4822 | -1.3 |
| 39.5 | 38.5 | 23380.5958 | -2.5 | 6.5  | 6.5  | 23368.5148 | -5.5 |
| 40.5 | 39.5 | 23381.0248 | -0.4 | 7.5  | 7.5  | 23368.5626 | -0.2 |
| 41.5 | 40.5 | 23381.4567 | -1.5 | 8.5  | 8.5  | 23368.6080 | -2.9 |
| 2.5  | 3.5  | 23367.7240 | -4.9 | 9.5  | 9.5  | 23368.6639 | -0.8 |
| 3.5  | 4.5  | 23367.5545 | -0.4 | 10.5 | 10.5 | 23368.7207 | -3.5 |
| 4.5  | 5.5  | 23367.3864 | -0.2 | 11.5 | 11.5 | 23368.7873 | -2.0 |

[23.61]<sup>4</sup>Γ<sub>7/2</sub>-<sup>4</sup>Φ<sub>5/2</sub> (0,0)

| J'   | J''  | Observed   | O-C  | J'   | J''  | Observed   | O-C  |
|------|------|------------|------|------|------|------------|------|
| 3.5  | 2.5  | 23575.7570 | -2.1 | 20.5 | 20.5 | 23575.8077 | 3.6  |
| 4.5  | 3.5  | 23575.9607 | -7.4 | 21.5 | 21.5 | 23575.8768 | -0.9 |
| 5.5  | 4.5  | 23576.1780 | -2.5 | 22.5 | 22.5 | 23575.9607 | 6.0  |
| 6.5  | 5.5  | 23576.3934 | -2.9 | 23.5 | 23.5 | 23576.0359 | 0.6  |
| 7.5  | 6.5  | 23576.6159 | 0.4  | 24.5 | 24.5 | 23576.1213 | 1.9  |
| 8.5  | 7.5  | 23576.8354 | -2.7 | 25.5 | 25.5 | 23576.2060 | -1.0 |
| 9.5  | 8.5  | 23577.0619 | -2.2 | 26.5 | 26.5 | 23576.2984 | 0.3  |
| 10.5 | 9.5  | 23577.2931 | -0.4 | 27.5 | 27.5 | 23576.3934 | 0.6  |
| 11.5 | 10.5 | 23577.5273 | 1.0  | 28.5 | 28.5 | 23576.4945 | 3.4  |
| 12.5 | 11.5 | 23577.7624 | -0.1 | 29.5 | 29.5 | 23576.5916 | -1.3 |
| 13.5 | 12.5 | 23578.0016 | -0.5 | 30.5 | 30.5 | 23576.6973 | -1.0 |
| 14.5 | 13.5 | 23578.2441 | -1.1 | 31.5 | 31.5 | 23576.8077 | 0.3  |
| 15.5 | 14.5 | 23578.4916 | 0.0  | 32.5 | 32.5 | 23576.9191 | -0.9 |
| 16.5 | 15.5 | 23578.7423 | 0.8  | 33.5 | 33.5 | 23577.0349 | -1.4 |
| 17.5 | 16.5 | 23578.9938 | -1.0 | 34.5 | 34.5 | 23577.1553 | -1.0 |
| 18.5 | 17.5 | 23579.2537 | 2.1  | 3.5  | 4.5  | 23574.1991 | -9.7 |
| 19.5 | 18.5 | 23579.5072 | -4.6 | 4.5  | 5.5  | 23574.0323 | 2.1  |
| 20.5 | 19.5 | 23579.7764 | 0.9  | 5.5  | 6.5  | 23573.8572 | 2.1  |
| 21.5 | 20.5 | 23580.0426 | 0.0  | 6.5  | 7.5  | 23573.6817 | -1.6 |
| 22.5 | 21.5 | 23580.3125 | -0.7 | 7.5  | 8.5  | 23573.5179 | 2.9  |
| 23.5 | 22.5 | 23580.5900 | 2.7  | 8.5  | 9.5  | 23573.3515 | 1.4  |
| 24.5 | 23.5 | 23580.8658 | 0.9  | 9.5  | 10.5 | 23573.1874 | -1.2 |
| 25.5 | 24.5 | 23581.1477 | 1.7  | 10.5 | 11.5 | 23573.0273 | -3.2 |
| 27.5 | 26.5 | 23581.7188 | 0.1  | 11.5 | 12.5 | 23572.8730 | -2.8 |
| 29.5 | 28.5 | 23582.3068 | 1.2  | 12.5 | 13.5 | 23572.7229 | -1.7 |
| 30.5 | 29.5 | 23582.6054 | 1.0  | 13.5 | 14.5 | 23572.5765 | -0.3 |
| 31.5 | 30.5 | 23582.9036 | -3.2 | 14.5 | 15.5 | 23572.4340 | 1.5  |
| 32.5 | 31.5 | 23583.2082 | -4.5 | 15.5 | 16.5 | 23572.2929 | 1.3  |
| 33.5 | 32.5 | 23583.5224 | 0.1  | 16.5 | 17.5 | 23572.1558 | 1.7  |
| 34.5 | 33.5 | 23583.8286 | -6.8 | 17.5 | 18.5 | 23572.0237 | 3.5  |
| 3.5  | 3.5  | 23575.0775 | -3.3 | 18.5 | 19.5 | 23571.8905 | 0.8  |

|      |      |            |      |      |      |            |      |
|------|------|------------|------|------|------|------------|------|
| 4.5  | 4.5  | 23575.0920 | -4.1 | 19.5 | 20.5 | 23571.7651 | 2.4  |
| 5.5  | 5.5  | 23575.1146 | -0.1 | 20.5 | 21.5 | 23571.6404 | 1.2  |
| 6.5  | 6.5  | 23575.1352 | -1.5 | 21.5 | 22.5 | 23571.5179 | -1.3 |
| 7.5  | 7.5  | 23575.1618 | -0.4 | 22.5 | 23.5 | 23571.4049 | 2.2  |
| 8.5  | 8.5  | 23575.2006 | 9.6  | 23.5 | 24.5 | 23571.2921 | 2.4  |
| 9.5  | 9.5  | 23575.2220 | -1.2 | 24.5 | 25.5 | 23571.1820 | 1.7  |
| 10.5 | 10.5 | 23575.2573 | -1.6 | 25.5 | 26.5 | 23571.0746 | 0.1  |
| 11.5 | 11.5 | 23575.2997 | 1.8  | 26.5 | 27.5 | 23570.9786 | 6.4  |
| 12.5 | 12.5 | 23575.3400 | -0.4 | 27.5 | 28.5 | 23570.8758 | 2.3  |
| 13.5 | 13.5 | 23575.3864 | 0.1  | 28.5 | 29.5 | 23570.7791 | 0.7  |
| 14.5 | 14.5 | 23575.4364 | 0.8  | 29.5 | 30.5 | 23570.6857 | -1.1 |
| 15.5 | 15.5 | 23575.4908 | 2.4  | 30.5 | 31.5 | 23570.5990 | 0.1  |
| 16.5 | 16.5 | 23575.5455 | 0.9  | 31.5 | 32.5 | 23570.5142 | -0.5 |
| 17.5 | 17.5 | 23575.6099 | 5.6  | 32.5 | 33.5 | 23570.4339 | -0.2 |
| 18.5 | 18.5 | 23575.6704 | 3.0  | 33.5 | 34.5 | 23570.3535 | -3.6 |
| 19.5 | 19.5 | 23575.7353 | 1.3  | 34.5 | 35.5 | 23570.2824 | -1.5 |

[23.61]<sup>4</sup>Γ<sub>9/2</sub><sup>-4</sup>Φ<sub>7/2</sub>(0,0)

| J'   | J''  | Observed   | O-C  | J'   | J''  | Observed   | O-C  |
|------|------|------------|------|------|------|------------|------|
| 4.5  | 3.5  | 23652.0327 | 1.6  | 17.5 | 17.5 | 23651.3082 | 1.3  |
| 5.5  | 4.5  | 23652.2305 | 0.1  | 20.5 | 20.5 | 23651.3669 | -1.5 |
| 6.5  | 5.5  | 23652.4317 | 1.1  | 21.5 | 21.5 | 23651.3916 | 0.2  |
| 7.5  | 6.5  | 23652.6312 | -0.7 | 22.5 | 22.5 | 23651.4163 | 0.5  |
| 8.5  | 7.5  | 23652.8340 | -0.1 | 25.5 | 25.5 | 23651.4944 | -2.8 |
| 9.5  | 8.5  | 23653.0328 | -4.5 | 26.5 | 26.5 | 23651.5267 | -0.5 |
| 10.5 | 9.5  | 23653.2406 | -1.0 | 27.5 | 27.5 | 23651.5553 | -3.5 |
| 11.5 | 10.5 | 23653.4464 | -0.5 | 28.5 | 28.5 | 23651.5908 | -1.1 |
| 12.5 | 11.5 | 23653.6512 | -2.0 | 29.5 | 29.5 | 23651.6268 | 0.2  |
| 13.5 | 12.5 | 23653.8600 | -0.6 | 30.5 | 30.5 | 23651.6595 | -3.5 |
| 14.5 | 13.5 | 23654.0708 | 1.7  | 31.5 | 31.5 | 23651.7032 | 2.1  |
| 15.5 | 14.5 | 23654.2793 | 0.6  | 32.5 | 32.5 | 23651.7412 | 0.2  |
| 16.5 | 15.5 | 23654.4908 | 1.3  | 33.5 | 33.5 | 23651.7859 | 3.3  |
| 17.5 | 16.5 | 23654.7059 | 4.5  | 5.5  | 6.5  | 23649.9026 | 0.4  |
| 18.5 | 17.5 | 23654.9151 | 0.6  | 6.5  | 7.5  | 23649.7231 | 8.6  |
| 19.5 | 18.5 | 23655.1273 | -1.5 | 7.5  | 8.5  | 23649.5253 | -2.4 |
| 20.5 | 19.5 | 23655.3411 | -3.3 | 8.5  | 9.5  | 23649.3412 | -0.8 |
| 21.5 | 20.5 | 23655.5583 | -2.9 | 9.5  | 10.5 | 23649.1559 | -1.4 |
| 22.5 | 21.5 | 23655.7797 | 0.4  | 10.5 | 11.5 | 23648.9696 | -4.0 |
| 23.5 | 22.5 | 23655.9999 | 1.1  | 11.5 | 12.5 | 23648.7925 | 1.5  |
| 24.5 | 23.5 | 23656.2197 | 0.0  | 12.5 | 13.5 | 23648.6087 | -0.7 |
| 25.5 | 24.5 | 23656.4425 | 0.5  | 13.5 | 14.5 | 23648.4315 | 2.5  |
| 26.5 | 25.5 | 23656.6670 | 1.3  | 14.5 | 15.5 | 23648.2494 | -0.3 |
| 27.5 | 26.5 | 23656.8938 | 2.9  | 15.5 | 16.5 | 23648.0723 | 0.8  |
| 28.5 | 27.5 | 23657.1230 | 5.3  | 16.5 | 17.5 | 23647.8955 | 1.1  |
| 29.5 | 28.5 | 23657.3488 | 2.8  | 17.5 | 18.5 | 23647.7194 | 0.8  |
| 30.5 | 29.5 | 23657.5766 | 0.6  | 18.5 | 19.5 | 23647.5473 | 3.3  |
| 31.5 | 30.5 | 23657.8075 | -0.1 | 19.5 | 20.5 | 23647.3715 | 0.8  |
| 32.5 | 31.5 | 23658.0403 | -0.7 | 20.5 | 21.5 | 23647.1970 | -1.6 |
| 33.5 | 32.5 | 23658.2711 | -5.0 | 21.5 | 22.5 | 23647.0252 | -2.6 |

|      |      |            |      |      |      |            |      |
|------|------|------------|------|------|------|------------|------|
| 34.5 | 33.5 | 23658.5136 | 0.6  | 22.5 | 23.5 | 23646.8605 | 2.1  |
| 35.5 | 34.5 | 23658.7531 | 1.2  | 23.5 | 24.5 | 23646.6883 | -2.1 |
| 36.5 | 35.5 | 23658.9938 | 1.2  | 24.5 | 25.5 | 23646.5209 | -2.9 |
| 37.5 | 36.5 | 23659.2341 | -1.3 | 25.5 | 26.5 | 23646.3594 | 0.7  |
| 38.5 | 37.5 | 23659.4796 | -0.6 | 26.5 | 27.5 | 23646.1960 | 0.9  |
| 39.5 | 38.5 | 23659.7275 | 0.5  | 27.5 | 28.5 | 23646.0337 | 0.7  |
| 40.5 | 39.5 | 23659.9723 | -3.8 | 37.5 | 38.5 | 23644.5058 | -2.1 |
| 9.5  | 9.5  | 23651.1938 | -0.5 | 38.5 | 39.5 | 23644.3670 | 0.9  |
| 14.5 | 14.5 | 23651.2555 | -0.8 | 39.5 | 40.5 | 23644.2279 | 1.4  |
| 16.5 | 16.5 | 23651.2862 | -2.7 | 40.5 | 41.5 | 23644.0915 | 2.4  |

[23.48]<sup>4</sup>Γ<sub>5/2</sub><sup>-4</sup>Φ<sub>3/2</sub> (1,1)

| J'   | J''  | Observed   | O-C  | J'   | J''  | Observed   | O-C  |
|------|------|------------|------|------|------|------------|------|
| 7.5  | 6.5  | 23412.5859 | -1.5 | 26.5 | 27.5 | 23406.5471 | 1.1  |
| 8.5  | 7.5  | 23412.7974 | -0.6 | 27.5 | 28.5 | 23406.4116 | -0.4 |
| 9.5  | 8.5  | 23413.0102 | -0.4 | 28.5 | 29.5 | 23406.2813 | 1.0  |
| 11.5 | 10.5 | 23413.4402 | -2.1 | 29.5 | 30.5 | 23406.1545 | 3.8  |
| 13.5 | 12.5 | 23413.8842 | 1.9  | 30.5 | 31.5 | 23406.0234 | 0.0  |
| 14.5 | 13.5 | 23414.1086 | 3.1  | 31.5 | 32.5 | 23405.9007 | 2.4  |
| 15.5 | 14.5 | 23414.3345 | 3.7  | 32.5 | 33.5 | 23405.7772 | 1.7  |
| 16.5 | 15.5 | 23414.5599 | 1.7  | 33.5 | 34.5 | 23405.6522 | -2.7 |
| 17.5 | 16.5 | 23414.7894 | 1.7  | 34.5 | 35.5 | 23405.5364 | -0.2 |
| 18.5 | 17.5 | 23415.0225 | 3.1  | 35.5 | 36.5 | 23405.4190 | -1.5 |
| 19.5 | 18.5 | 23415.2574 | 4.2  | 36.5 | 37.5 | 23405.3052 | -1.5 |
| 20.5 | 19.5 | 23415.4902 | 1.1  | 37.5 | 38.5 | 23405.1935 | -1.8 |
| 21.5 | 20.5 | 23415.7264 | -0.7 | 38.5 | 39.5 | 23405.0838 | -2.3 |
| 22.5 | 21.5 | 23415.9645 | -2.8 | 39.5 | 40.5 | 23404.9760 | -3.2 |
| 23.5 | 22.5 | 23416.2120 | 2.4  | 40.5 | 41.5 | 23404.8732 | -1.4 |
| 24.5 | 23.5 | 23416.4535 | -0.6 | 41.5 | 42.5 | 23404.7708 | -1.6 |
| 25.5 | 24.5 | 23416.7004 | -0.3 | 42.5 | 43.5 | 23404.6684 | -4.1 |
| 26.5 | 25.5 | 23416.9499 | 0.5  | 43.5 | 44.5 | 23404.5777 | 2.8  |
| 27.5 | 26.5 | 23417.2041 | 3.8  | 44.5 | 45.5 | 23404.4769 | -2.8 |
| 28.5 | 27.5 | 23417.4562 | 2.8  | 45.5 | 46.5 | 23404.3862 | -0.7 |
| 29.5 | 28.5 | 23417.7104 | 1.7  | 46.5 | 47.5 | 23404.2968 | 0.3  |
| 30.5 | 29.5 | 23417.9659 | -0.2 | 3.5  | 3.5  | 23411.0919 | 0.5  |
| 31.5 | 30.5 | 23418.2294 | 3.6  | 5.5  | 5.5  | 23411.1099 | -2.5 |
| 33.5 | 32.5 | 23418.7471 | -4.5 | 7.5  | 7.5  | 23411.1413 | -0.5 |
| 34.5 | 33.5 | 23419.0166 | -1.2 | 9.5  | 9.5  | 23411.1796 | 0.0  |
| 35.5 | 34.5 | 23419.2851 | -1.2 | 10.5 | 10.5 | 23411.1996 | -2.0 |
| 36.5 | 35.5 | 23419.5557 | -1.2 | 11.5 | 11.5 | 23411.2233 | -2.5 |
| 37.5 | 36.5 | 23419.8288 | -1.0 | 13.5 | 13.5 | 23411.2817 | 1.2  |
| 38.5 | 37.5 | 23420.1007 | -4.2 | 14.5 | 14.5 | 23411.3120 | 1.0  |
| 39.5 | 38.5 | 23420.3789 | -3.4 | 15.5 | 15.5 | 23411.3387 | -4.9 |
| 40.5 | 39.5 | 23420.6584 | -3.5 | 16.5 | 16.5 | 23411.3721 | -6.3 |
| 41.5 | 40.5 | 23420.9386 | -5.2 | 17.5 | 17.5 | 23411.4098 | -5.5 |
| 42.5 | 41.5 | 23421.2255 | -2.5 | 18.5 | 18.5 | 23411.4528 | -1.5 |
| 43.5 | 42.5 | 23421.5083 | -6.1 | 19.5 | 19.5 | 23411.4975 | 2.0  |
| 44.5 | 43.5 | 23421.8015 | -1.6 | 20.5 | 20.5 | 23411.5405 | 1.7  |
| 45.5 | 44.5 | 23422.0897 | -4.4 | 21.5 | 21.5 | 23411.5869 | 2.7  |

|      |      |            |      |      |      |            |      |
|------|------|------------|------|------|------|------------|------|
| 46.5 | 45.5 | 23422.3873 | -0.2 | 22.5 | 22.5 | 23411.6346 | 2.8  |
| 47.5 | 46.5 | 23422.6815 | -1.6 | 23.5 | 23.5 | 23411.6820 | 0.4  |
| 48.5 | 47.5 | 23422.9820 | 0.9  | 24.5 | 24.5 | 23411.7357 | 2.1  |
| 49.5 | 48.5 | 23423.2850 | 3.6  | 25.5 | 25.5 | 23411.7897 | 2.0  |
| 50.5 | 49.5 | 23423.5918 | 7.7  | 26.5 | 26.5 | 23411.8464 | 2.5  |
| 5.5  | 6.5  | 23409.8571 | -2.5 | 27.5 | 27.5 | 23411.9041 | 1.7  |
| 6.5  | 7.5  | 23409.6773 | -3.2 | 28.5 | 28.5 | 23411.9658 | 2.7  |
| 7.5  | 8.5  | 23409.5021 | -1.4 | 29.5 | 29.5 | 23412.0249 | -1.0 |
| 8.5  | 9.5  | 23409.3257 | -2.9 | 30.5 | 30.5 | 23412.0912 | 0.3  |
| 9.5  | 10.5 | 23409.1542 | -1.6 | 32.5 | 32.5 | 23412.2317 | 4.0  |
| 10.5 | 11.5 | 23408.9855 | 0.3  | 34.5 | 34.5 | 23412.3738 | 0.5  |
| 11.5 | 12.5 | 23408.8160 | -0.6 | 35.5 | 35.5 | 23412.4525 | 3.0  |
| 12.5 | 13.5 | 23408.6512 | 1.0  | 36.5 | 36.5 | 23412.5292 | 1.3  |
| 13.5 | 14.5 | 23408.4844 | -1.6 | 37.5 | 37.5 | 23412.6106 | 2.0  |
| 14.5 | 15.5 | 23408.3230 | -0.8 | 38.5 | 38.5 | 23412.6940 | 2.4  |
| 15.5 | 16.5 | 23408.1632 | -0.6 | 39.5 | 39.5 | 23412.7781 | 1.3  |
| 16.5 | 17.5 | 23408.0064 | 0.5  | 40.5 | 40.5 | 23412.8644 | 0.1  |
| 17.5 | 18.5 | 23407.8517 | 1.5  | 41.5 | 41.5 | 23412.9518 | -2.3 |
| 18.5 | 19.5 | 23407.6982 | 1.6  | 42.5 | 42.5 | 23413.0486 | 2.4  |
| 19.5 | 20.5 | 23407.5455 | 0.3  | 43.5 | 43.5 | 23413.1403 | -0.3 |
| 20.5 | 21.5 | 23407.3947 | -1.2 | 44.5 | 44.5 | 23413.2390 | 1.6  |
| 21.5 | 22.5 | 23407.2513 | 2.5  | 45.5 | 45.5 | 23413.3361 | -0.4 |
| 22.5 | 23.5 | 23407.1068 | 2.9  | 46.5 | 46.5 | 23413.4402 | 2.3  |
| 23.5 | 24.5 | 23406.9584 | -2.7 | 47.5 | 47.5 | 23413.5459 | 4.2  |
| 24.5 | 25.5 | 23406.8203 | -0.3 | 48.5 | 48.5 | 23413.6490 | 1.1  |
| 25.5 | 26.5 | 23406.6852 | 3.0  |      |      |            |      |
